# Supplementary material
Source: PubMed Central journal article supplement (PMC8394698)
Supplement: NIHMS1730809-supplement-Figure_1_Consort_Diagram.pdf [file NIHMS1730809-supplement-Figure_1_Consort_Diagram.pdf]

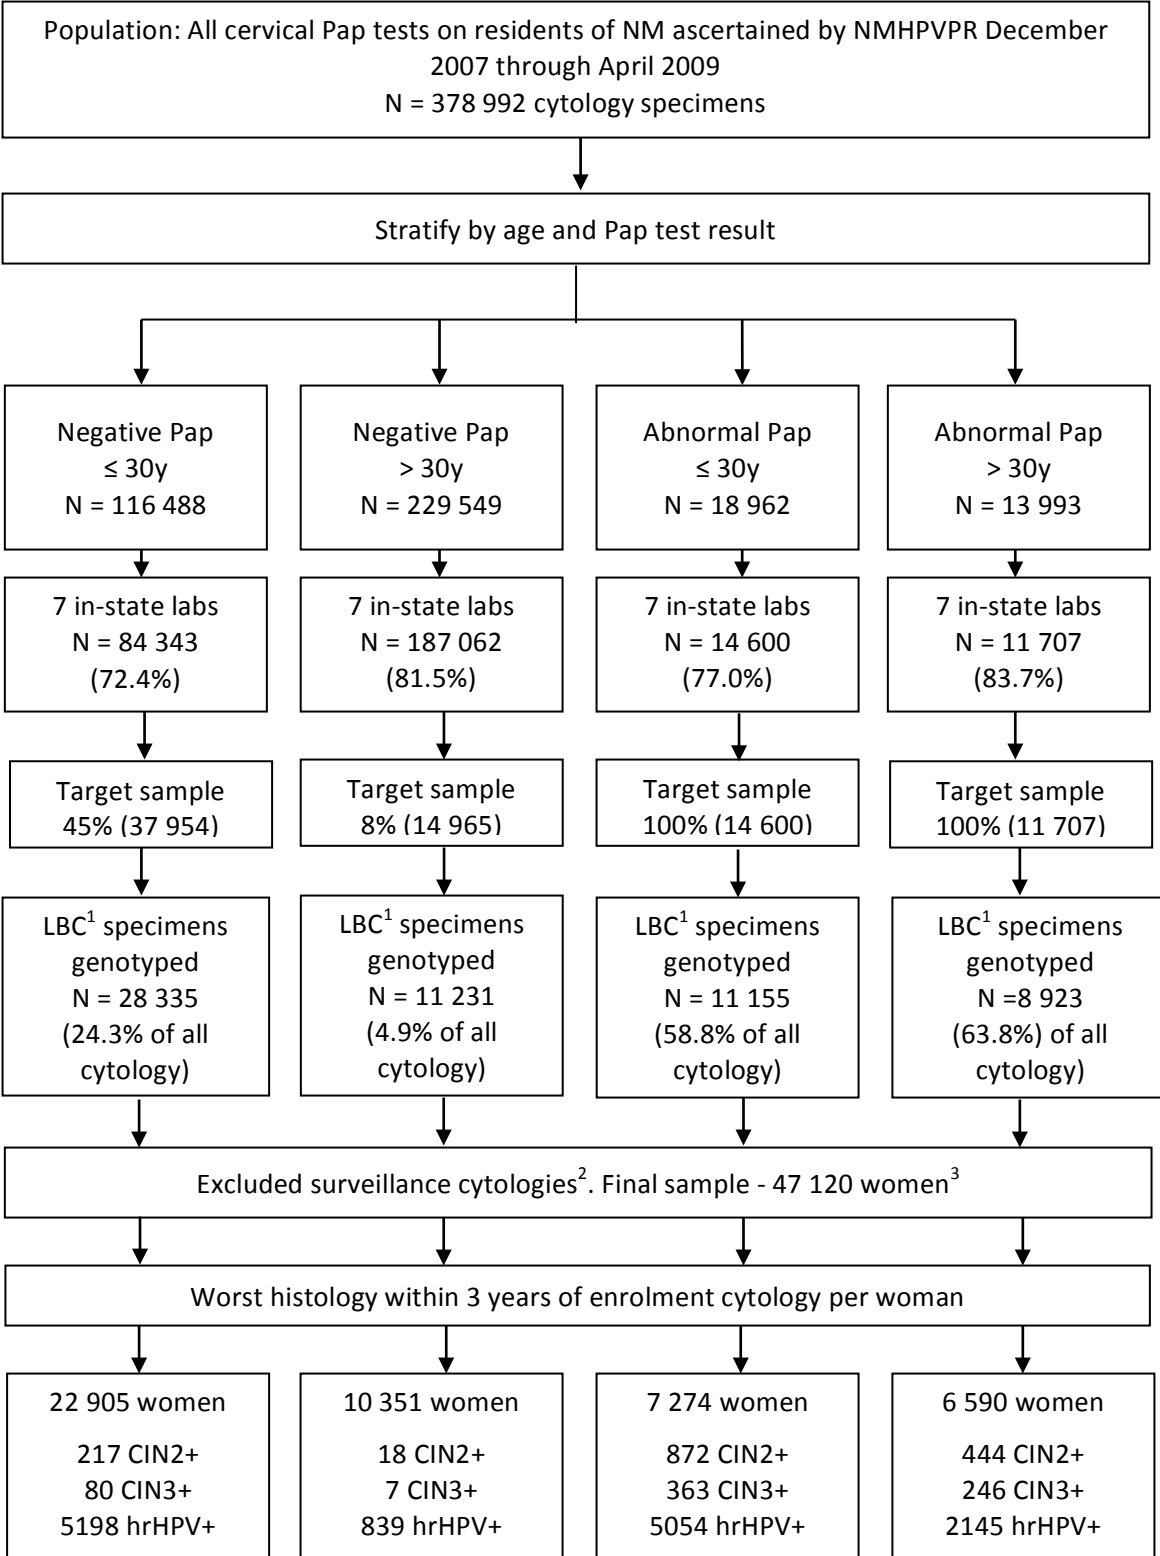

<sup>1</sup>Liquid Based Cytology

<sup>2</sup>Surveillance cytology is cytology (Pap) test <300 days prior to the screening sample.

<sup>3</sup>Restricted to women 15-75 years

**Supplementary Figure 1. Study CONSORT diagram.**

A consort diagram showing the selection process of LBC samples for full genotyping. The number of cervical screening samples collected by the New Mexico HPV Pap Registry between December 2007 – April 2009 is shown. Stratification is by cytology (normal versus abnormal) and age ( $\leq 30$  years versus  $>30$  years). Target and actual percentages of samples selected shown. Number of women in each stratum, with number CIN2+, CIN3+ and positive for at least 1 hrHPV type are identified.
