# Supplementary material
Source: PubMed Central journal article supplement (PMC8394698)
Supplement: NIHMS1730809-supplement-Tables_1-5_Supplement.pdf [file NIHMS1730809-supplement-Tables_1-5_Supplement.pdf]

Supplementary Table 1: Sample size and proportion of women sampled from the state-wide population, based on age and cytology for December 2007- April 2009. Sample restricted to women 15-75 years.

| Age (years) | Cytology | Sample (N) | Ratio (%) (Sampling) | Number of screened women in the state-wide population |
|-------------|----------|------------|----------------------|-------------------------------------------------------|
| >30         | Negative | 10 351     | 4.89 (20.44)         | 211 563                                               |
|             | Abnormal | 6590       | 63.7 (1.57)          | 10 334                                                |
| ≤30         | Negative | 22 905     | 24.3 (4.11)          | 94 165                                                |
|             | Abnormal | 7274       | 58.8 (1.70)          | 12 365                                                |
| Total       |          | 47 120     |                      | 328 427                                               |

Supplementary Table 2: High-risk (hr) HPV genotype-specific Positive Predictive Values (PPV) and hierarchical ranking by PPV for CIN2+ detected within 3 years of the enrolment cytology, weighted to the state-wide population.

| hrHPV type | Individual hrHPV type | For the new hrHPV type |          |        |         | Cumulative |        |         |             |             |
|------------|-----------------------|------------------------|----------|--------|---------|------------|--------|---------|-------------|-------------|
|            | PPV (%) (95% CI)      | N at risk              | Positive |        | PPV (%) | Positive   |        | PPV (%) | Sensitivity | Specificity |
|            |                       |                        | CIN2+    | HPV    |         | CIN2+      | HPV    |         |             |             |
| 16         | 11.87 (11.28, 12.47)  | 328 427                | 1359     | 11 445 | 11.87   | 1359       | 11 445 | 11.87   | 39.52       | 96.90       |
| 33         | 10.09 (8.60, 11.58)   | 316 981                | 108      | 1360   | 7.91    | 1467       | 12 805 | 11.45   | 42.65       | 96.51       |
| 31         | 8.20 (7.50, 8.90)     | 315 622                | 350      | 5139   | 6.80    | 1816       | 17 944 | 10.12   | 52.81       | 95.04       |
| 35         | 6.37 (5.48, 7.26)     | 310 483                | 130      | 2365   | 5.51    | 1946       | 20 308 | 9.58    | 56.60       | 94.35       |
| 18         | 6.25 (5.49, 7.00)     | 308 118                | 148      | 2930   | 5.04    | 2094       | 23 238 | 9.01    | 60.90       | 93.49       |
| 58         | 6.04 (5.30, 6.79)     | 305 189                | 114      | 2860   | 4.00    | 2208       | 26 098 | 8.46    | 64.23       | 92.65       |
| 51         | 5.24 (4.74, 5.75)     | 302 329                | 188      | 5543   | 3.39    | 2396       | 31 640 | 7.57    | 69.69       | 91.00       |
| 45         | 4.71 (4.01, 5.42)     | 296 786                | 58       | 2465   | 2.35    | 2454       | 34 106 | 7.20    | 71.37       | 90.26       |
| 39         | 4.85 (4.34, 5.35)     | 294 321                | 103      | 4638   | 2.21    | 2557       | 38 743 | 6.60    | 74.35       | 88.87       |
| 52         | 4.76 (4.23, 5.28)     | 289 683                | 76       | 4088   | 1.85    | 2632       | 42 831 | 6.15    | 76.55       | 87.63       |
| 59         | 3.76 (3.31, 4.21)     | 285 595                | 72       | 4008   | 1.80    | 2705       | 46 840 | 5.77    | 78.65       | 86.42       |
| 56         | 3.41 (2.86, 3.96)     | 281 587                | 23       | 2171   | 1.04    | 2727       | 49 011 | 5.56    | 79.31       | 85.76       |
| 68         | 3.37 (2.68, 4.05)     | 279 416                | 9        | 1462   | 0.61    | 2736       | 50 473 | 5.42    | 79.57       | 85.31       |

CI: Confidence Interval

For example, the highest ranked HPV type was the genotype with the highest univariate PPV. All co-infections with this HPV type were then excluded from the subsequent analysis, and the HPV type with the next highest PPV was identified. This was repeated for all 13 hrHPV types.

Supplementary Table 3a: High-risk (hr) HPV genotype-specific Positive Predictive Values (PPV) and hierarchical ranking by PPV for CIN3+ detected within 3 years of the enrolment cytology for women  $\leq 30$  years, weighted to the state-wide population.

| hrHPV type | Individual hrHPV type | For the new hrHPV type |          |      |         | Cumulative |        |         |             |             |
|------------|-----------------------|------------------------|----------|------|---------|------------|--------|---------|-------------|-------------|
|            | PPV (%) (95% CI)      | N at risk              | Positive |      | PPV (%) | Positive   |        | PPV (%) | Sensitivity | Specificity |
|            |                       |                        | CIN3+    | HPV  |         | CIN3+      | HPV    |         |             |             |
| 16         | 7.46 (6.87, 8.05)     | 106 530                | 568      | 7622 | 7.46    | 568        | 7622   | 7.46    | 60.08       | 93.32       |
| 33         | 5.76 (4.31, 7.21)     | 98 908                 | 29       | 797  | 3.68    | 598        | 8419   | 7.10    | 63.18       | 92.59       |
| 31         | 4.18 (3.55, 4.82)     | 98 111                 | 97       | 3082 | 3.15    | 695        | 11 501 | 6.04    | 73.45       | 89.77       |
| 45         | 3.47 (2.68, 4.26)     | 95 029                 | 39       | 1575 | 2.49    | 734        | 13 076 | 5.61    | 77.60       | 88.31       |
| 35         | 2.78 (1.99, 3.58)     | 93 454                 | 20       | 1166 | 1.75    | 754        | 14 242 | 5.30    | 79.76       | 87.23       |
| 52         | 2.74 (2.23, 3.25)     | 92 288                 | 37       | 2869 | 1.29    | 792        | 17 111 | 4.63    | 83.69       | 84.54       |
| 58         | 2.18 (1.63, 2.73)     | 89 419                 | 22       | 1841 | 1.20    | 814        | 18 953 | 4.29    | 86.02       | 82.82       |
| 18         | 2.02 (1.47, 2.56)     | 87 577                 | 14       | 1441 | 0.94    | 827        | 20 393 | 4.06    | 87.46       | 81.47       |
| 59         | 1.71 (1.34, 2.09)     | 86 136                 | 21       | 2702 | 0.77    | 848        | 23 095 | 3.67    | 89.66       | 78.93       |
| 51         | 1.70 (1.35, 2.05)     | 83 434                 | 15       | 2850 | 0.53    | 863        | 25 945 | 3.33    | 91.25       | 76.24       |
| 39         | 1.99 (1.59, 2.39)     | 80 585                 | 8        | 2366 | 0.32    | 871        | 28 311 | 3.08    | 92.04       | 74.01       |
| 56         | 1.38 (0.94, 1.83)     | 78 219                 | 3        | 1102 | 0.31    | 874        | 29 413 | 2.97    | 92.40       | 72.97       |
| 68         | 1.08 (0.54, 1.61)     | 77 116                 | 0        | 547  | 0.00    | 874        | 29 961 | 2.92    | 92.40       | 72.45       |

CI: Confidence Interval

For example, the highest ranked HPV type was the genotype with the highest univariate PPV. All co-infections with this HPV type were then excluded from the subsequent analysis, and the HPV type with the next highest PPV was identified. This was repeated for all 13 hrHPV types.

Supplementary Table 3b: High-risk (hr) HPV genotype-specific Positive Predictive Values (PPV) and hierarchical ranking by PPV for CIN3+ detected within 3 years of the enrolment cytology for women >30 years, weighted to the state-wide population.

| hrHPV type | Individual hrHPV type | For the new hrHPV type |          |      |         | Cumulative |        |         |             |             |
|------------|-----------------------|------------------------|----------|------|---------|------------|--------|---------|-------------|-------------|
|            | PPV (%) (95% CI)      | N at risk              | Positive |      | PPV (%) | Positive   |        | PPV (%) | Sensitivity | Specificity |
|            |                       |                        | CIN3+    | HPV  |         | CIN3+      | HPV    |         |             |             |
| 16         | 6.03 (5.28, 6.79)     | 221 897                | 231      | 3823 | 6.03    | 231        | 3823   | 6.03    | 43.60       | 98.38       |
| 33         | 3.53 (2.02, 5.03)     | 218 074                | 16       | 563  | 2.79    | 246        | 4386   | 5.62    | 46.57       | 98.13       |
| 18         | 2.24 (1.47, 3.02)     | 217 511                | 28       | 1282 | 2.20    | 275        | 5668   | 4.84    | 51.90       | 97.56       |
| 31         | 2.24 (1.62, 2.86)     | 216 229                | 39       | 2001 | 1.96    | 314        | 7669   | 4.09    | 59.32       | 96.68       |
| 58         | 2.39 (1.55, 3.24)     | 214 228                | 17       | 1086 | 1.59    | 331        | 8754   | 3.78    | 62.58       | 96.19       |
| 51         | 1.80 (1.26, 2.33)     | 213 143                | 28       | 2065 | 1.37    | 359        | 10 819 | 3.32    | 67.93       | 95.27       |
| 59         | 1.50 (1.01, 1.98)     | 211 078                | 27       | 1963 | 1.36    | 386        | 12 783 | 3.02    | 72.98       | 94.40       |
| 52         | 1.33 (0.87, 1.80)     | 209 114                | 17       | 1966 | 0.88    | 403        | 14 749 | 2.73    | 76.24       | 93.52       |
| 35         | 1.22 (0.62, 1.82)     | 207 148                | 6        | 944  | 0.66    | 409        | 15 693 | 2.61    | 77.42       | 93.10       |
| 39         | 1.11 (0.68, 1.55)     | 206 204                | 9        | 1757 | 0.54    | 419        | 17 451 | 2.40    | 79.20       | 92.31       |
| 45         | 1.09 (0.55, 1.63)     | 204 446                | 5        | 1078 | 0.44    | 424        | 18 529 | 2.29    | 80.09       | 91.82       |
| 68         | 0.87 (0.36, 1.39)     | 203 368                | 2        | 920  | 0.17    | 425        | 19 448 | 2.19    | 80.39       | 91.41       |
| 56         | 0.31 (0.03, 0.60)     | 202 449                | 0        | 1064 | 0.00    | 425        | 20 512 | 2.07    | 80.39       | 90.93       |

CI: Confidence Interval

For example, the highest ranked HPV type was the genotype with the highest univariate PPV. All co-infections with this HPV type were then excluded from the subsequent analysis, and the HPV type with the next highest PPV was identified. This was repeated for all 13 hrHPV types.

Supplementary Table 4: Hierarchical odds ratios for CIN2+ for high-risk (hr) HPV genotypes and for different viral load groups (high, intermediate [Inter], low) ordered by the genotype hierarchy and weighted to the state-wide population of women.

| HPV type                     | Viral load (N, %)               | OR (95% CI)          | P-value   | OR (95% CI)       | P-value | OR (95% CI)       | P-value |
|------------------------------|---------------------------------|----------------------|-----------|-------------------|---------|-------------------|---------|
| <i>Any hrHPV<sup>a</sup></i> | <i>High (18 226, 5.6)</i>       | 40.36 (31.69, 51.39) | 1.1E-195  | 4.20 (3.34, 5.28) | 1.4E-34 | 2.19 (1.84, 2.60) | 7.4E-19 |
|                              | <i>Inter (13 353, 4.1)</i>      | 18.42 (14.04, 24.17) | 1.0E-97   | 1.92 (1.48, 2.49) | 9.6E-07 | <i>ref</i>        |         |
|                              | <i>Low (18 894, 5.8)</i>        | 9.61 (7.05, 13.11)   | 2.3E-46   | <i>ref</i>        |         |                   |         |
|                              | <i>Negative (277 954, 84.6)</i> | <i>ref</i>           |           |                   |         |                   |         |
|                              | <i>P-value (trend)</i>          | 1.9E-293             |           | 8.0E-41           |         |                   |         |
| 16                           | High (6171, 1.9)                | 32.40 (27.84, 37.70) | <3.8E-442 | 5.28 (3.27, 8.52) | 1E-11   | 3.02 (2.23, 4.10) | 1.7E-12 |
|                              | Inter (2431, 0.7)               | 10.72 (7.92, 14.50)  | 3.2E-53   | 1.75 (1.01, 3.01) | 0.05    | <i>ref</i>        |         |
|                              | Low (2844, 0.9)                 | 6.14 (3.82, 9.87)    | 7.3E-14   | <i>ref</i>        |         |                   |         |
|                              | Negative (316 981, 96.5)        | <i>ref</i>           |           |                   |         |                   |         |
|                              | <i>P-value (trend)</i>          | <1.3E-458            |           | 5.9E-16           |         |                   |         |
| 33                           | High (564, 0.2)                 | 18.25 (11.39, 29.23) | 1.6E-33   | 2.48 (1.10, 5.58) | 0.03    | 1.10 (0.46, 2.67) | 0.82    |
|                              | Inter (287, 0.1)                | 16.52 (7.75, 35.19)  | 3.7E-13   | 2.24 (0.82, 6.14) | 0.12    | <i>ref</i>        |         |
|                              | Low (509, 0.2)                  | 7.37 (3.75, 14.49)   | 7.0E-09   | <i>ref</i>        |         |                   |         |
|                              | Negative (315 622, 96.1)        | <i>ref</i>           |           |                   |         |                   |         |
|                              | <i>P-value (trend)</i>          | 6.6E-49              |           | 0.03              |         |                   |         |
| 31                           | High (781, 0.2)                 | 22.96 (12.85, 41.05) | 4.2E-26   | 2.84 (1.48, 5.44) | 2E-03   | 1.23 (0.66, 2.31) | 0.52    |
|                              | Inter (1807, 0.6)               | 18.67 (13.80, 25.27) | 8.2E-80   | 2.31 (1.50, 3.55) | 2E-04   | <i>ref</i>        |         |
|                              | Low (52551, 0.8)                | 8.10 (5.69, 11.51)   | 3.0E-31   | <i>ref</i>        |         |                   |         |
|                              | Negative (310 483, 94.5)        | <i>ref</i>           |           |                   |         |                   |         |
|                              | <i>P-value (trend)</i>          | 7.7E-98              |           | 2.1E-04           |         |                   |         |
| 35                           | High (354, 0.1)                 | 23.09 (13.21, 40.35) | 3.2E-28   | 2.99 (1.37, 6.55) | 6E-03   | 1.75 (0.87, 3.52) | 0.12    |
|                              | Inter (902, 0.3)                | 13.19 (8.38, 20.76)  | 8.7E-29   | 1.71 (0.84, 3.49) | 0.14    | <i>ref</i>        |         |
|                              | Low (1109, 0.3)                 | 7.72 (4.33, 13.76)   | 4.2E-12   | <i>ref</i>        |         |                   |         |
|                              | Negative (308 118, 92.9)        | <i>ref</i>           |           |                   |         |                   |         |
|                              | <i>P-value (trend)</i>          | 3.4E-60              |           | 0.01              |         |                   |         |

Supplementary Table 4: Continued.

| HPV type | Viral load (N, %)        | OR (95% CI)          | P-value | OR (95% CI)         | P-value | OR (95% CI)        | P-value |
|----------|--------------------------|----------------------|---------|---------------------|---------|--------------------|---------|
| 18       | High (1458, 0.4)         | 18.86 (13.38, 26.58) | 7.2E-63 | 3.95 (1.77, 8.83)   | 8.4E-04 | 2.86 (1.40, 5.86)  | 4.1E-03 |
|          | Inter (641, 0.2)         | 6.59 (3.40, 12.79)   | 2.5E-08 | 1.38 (0.51, 3.70)   | 0.52    | <i>ref</i>         |         |
|          | Low (830, 0.3)           | 4.78 (2.25, 10.14)   | 4.7E-05 | <i>ref</i>          |         |                    |         |
|          | Negative (305 189, 92.9) | <i>ref</i>           |         |                     |         |                    |         |
|          | <i>P-value (trend)</i>   | 1.2E-68              |         | 2.4E-04             |         |                    |         |
| 58       | High (1483, 0.5)         | 16.19 (11.47, 22.86) | 3.1E-56 | 5.54 (1.77, 17.38)  | 3.4E-03 | 2.92 (1.31, 6.52)  | 0.01    |
|          | Inter (595, 0.2)         | 5.55 (2.60, 11.85)   | 9.4E-06 | 1.90 (0.50, 7.19)   | 0.34    | <i>ref</i>         |         |
|          | Low (781, 0.2)           | 2.92 (0.96, 8.87)    | 0.06    | <i>ref</i>          |         |                    |         |
|          | Negative (302 329, 92.1) | <i>ref</i>           |         |                     |         |                    |         |
|          | <i>P-value (trend)</i>   | 3.8E-58              |         | 1.0E-03             |         |                    |         |
| 51       | High (1063, 0.3)         | 13.37 (8.74, 20.46)  | 6.9E-33 | 2.00 (0.88, 4.55)   | 0.10    | 1.02 (0.50, 2.12)  | 0.95    |
|          | Inter (1755, 0.5)        | 13.05 (6.92, 24.62)  | 2.2E-15 | 1.95 (0.75, 5.04)   | 0.17    | <i>ref</i>         |         |
|          | Low (2725, 0.8)          | 6.70 (3.19, 14.05)   | 4.8E-07 | <i>ref</i>          |         |                    |         |
|          | Negative (296 786, 90.4) | <i>ref</i>           |         |                     |         |                    |         |
|          | <i>P-value (trend)</i>   | 1.6E-45              |         | 0.06                |         |                    |         |
| 45       | High (873, 0.3)          | 10.44 (6.10, 17.87)  | 1.2E-17 | 2.62 (0.79, 8.69)   | 0.11    | 1.45 (0.54, 3.91)  | 0.46    |
|          | Inter (710, 0.2)         | 7.18 (3.02, 17.08)   | 8.1E-06 | 1.80 (0.45, 7.20)   | 0.40    | <i>ref</i>         |         |
|          | Low (882, 0.3)           | 3.98 (1.32, 11.98)   | 1.4E-02 | <i>ref</i>          |         |                    |         |
|          | Negative (294 321, 89.6) | <i>ref</i>           |         |                     |         |                    |         |
|          | <i>P-value (trend)</i>   | 1.1E-22              |         | 0.09                |         |                    |         |
| 39       | High (1157, 0.4)         | 7.07 (4.03, 12.39)   | 9.2E-12 | 1.06 (0.36, 3.11)   | 0.91    | 0.76 (0.35, 1.63)  | 0.47    |
|          | Inter (1124, 0.3)        | 9.36 (5.20, 16.83)   | 8.5E-14 | 1.41 (0.47, 4.18)   | 0.54    | <i>ref</i>         |         |
|          | Low (2356, 0.7)          | 6.64 (2.57, 17.15)   | 9.1E-05 | <i>ref</i>          |         |                    |         |
|          | Negative (289 683, 88.2) | <i>ref</i>           |         |                     |         |                    |         |
|          | <i>P-value (trend)</i>   | 1.2E-25              |         | 0.83                |         |                    |         |
| 52       | High (1202, 0.4)         | 16.93 (10.54, 27.19) | 1.4E-31 | 12.00 (4.06, 35.50) | 7.8E-06 | 4.08 (1.61, 10.36) | 3.2E-03 |
|          | Inter (1210, 0.4)        | 4.15 (1.77, 9.72)    | 1.0E-03 | 2.94 (0.80, 10.76)  | 0.10    | <i>ref</i>         |         |
|          | Low (1677, 0.5)          | 1.41 (0.51, 3.90)    | 0.51    | <i>ref</i>          |         |                    |         |
|          | Negative (285 595, 87.0) | <i>ref</i>           |         |                     |         |                    |         |
|          | <i>P-value (trend)</i>   | 2.6E-29              |         | 2.3E-06             |         |                    |         |

Supplementary Table 4: Continued.

| HPV type | Viral load (N, %)        | OR (95% CI)         | P-value | OR (95% CI)          | P-value | OR (95% CI)       | P-value |
|----------|--------------------------|---------------------|---------|----------------------|---------|-------------------|---------|
| 59       | High (1779, 0.5)         | 11.03 (4.46, 27.24) | 2.0E-07 | 3.08 (0.77, 12.35)   | 0.11    | 2.61 (0.70, 9.81) | 0.15    |
|          | Inter (976, 0.3)         | 4.22 (1.53, 11.64)  | 5.4E-03 | 1.18 (0.27, 5.11)    | 0.83    | <i>ref</i>        |         |
|          | Low (1254, 0.4)          | 3.58 (1.19, 10.75)  | 0.02    | <i>ref</i>           |         |                   |         |
|          | Negative (281 587, 85.7) | <i>ref</i>          |         |                      |         |                   |         |
|          | <i>P-value (trend)</i>   | 1.2E-08             |         | 0.11                 |         |                   |         |
| 56       | High (750, 0.2)          | 5.26 (2.23, 12.41)  | 1.5E-04 | 7.68 (0.90, 65.67)   | 0.06    | 0.54 (0.14, 1.98) | 0.35    |
|          | Inter (446, 0.1)         | 9.82 (3.52, 27.41)  | 1.3E-05 | 14.35 (1.56, 132.00) | 0.02    | <i>ref</i>        |         |
|          | Low (975, 0.3)           | 0.68 (0.09, 4.97)   | 0.71    | <i>ref</i>           |         |                   |         |
|          | Negative (279 416, 85.1) | <i>ref</i>          |         |                      |         |                   |         |
|          | <i>P-value (trend)</i>   | 2.3E-07             |         | 0.02                 |         |                   |         |
| 68       | High (591, 0.2)          | 3.26 (0.99, 10.67)  | 0.05    | 0.80 (0.08, 8.12)    | 0.85    | -                 | -       |
|          | Inter (469, 0.1)         | -                   |         | -                    |         |                   |         |
|          | Low (402, 0.1)           | 4.08 (0.55, 30.28)  | 0.17    | <i>ref</i>           |         |                   |         |
|          | Negative (277 954, 84.6) | <i>ref</i>          |         |                      |         |                   |         |
|          | <i>P-value (trend)</i>   | 0.09                |         | 0.93                 |         |                   |         |

Multiple HPV infections with types ranked higher in the hierarchy are excluded.

Separate analyses are shown with low and intermediate viral loads as the reference category.

\*Highest ranked hrHPV type per woman

OR: Odds Ratio, CI: Confidence Interval

Supplementary Table 5: Hierarchical ranking based on high-risk (hr) HPV genotype and viral load (high, intermediate [Inter], low) Positive Predictive Values (PPV) for CIN3+ compared with hierarchical PPV values (from Table 4) based on hrHPV genotype alone. All data weighted to the state-wide population level.

| Category |            | CIN3+                                      |         |                                  |
|----------|------------|--------------------------------------------|---------|----------------------------------|
|          |            | Hierarchy based<br>on hrHPV and viral load |         | From Table 4<br>(genotype alone) |
| hrHPV    | Viral load | N                                          | PPV (%) | PPV (%)                          |
| 16       | High       | 6171                                       | 10.56   | 10.56                            |
| 33       | Inter      | 304                                        | 6.36    | 6.20                             |
| 33       | High       | 599                                        | 4.27    | 3.93                             |
| 31       | Inter      | 1908                                       | 4.09    | 4.32                             |
| 16       | Inter      | 2353                                       | 3.48    | 3.58                             |
| 52       | High       | 1663                                       | 3.07    | 2.55                             |
| 35       | High       | 393                                        | 2.53    | 2.50                             |
| 58       | High       | 1801                                       | 2.45    | 2.20                             |
| 18       | High       | 1519                                       | 2.25    | 2.52                             |
| 31       | High       | 718                                        | 2.16    | 1.77                             |
| 16       | Low        | 2572                                       | 1.98    | 2.11                             |
| 45       | Low        | 948                                        | 1.84    | 1.25                             |
| 31       | Low        | 2449                                       | 1.62    | 1.75                             |
| 35       | Inter      | 811                                        | 1.64    | 1.97                             |
| 39       | High       | 2427                                       | 1.35    | 0.83                             |
| 45       | High       | 896                                        | 1.36    | 1.07                             |
| 45       | Inter      | 750                                        | 1.23    | 1.23                             |
| 39       | Inter      | 1203                                       | 1.23    | 0.56                             |
| 51       | Low        | 2540                                       | 1.07    | 1.11                             |
| 18       | Inter      | 590                                        | 1.09    | 0.95                             |
| 51       | High       | 996                                        | 0.98    | 0.55                             |
| 39       | High       | 1156                                       | 0.85    | 0.83                             |
| 59       | Inter      | 1118                                       | 0.66    | 0.65                             |
| 51       | Inter      | 1506                                       | 0.65    | 0.78                             |
| 59       | Low        | 1341                                       | 0.56    | 0.42                             |
| 56       | High       | 807                                        | 0.42    | 0.45                             |
| 33       | Low        | 407                                        | 0.42    | 1.00                             |
| 52       | Inter      | 1175                                       | 0.27    | 0.84                             |
| 68       | High       | 642                                        | 0.24    | 0.27                             |
| 18       | Low        | 682                                        | 0.23    | 1.25                             |
| 52       | Low        | 1651                                       | 0.20    | 0.26                             |
| 35       | Low        | 803                                        | 0.20    | 0.85                             |
| 39       | Low        | 2148                                       | 0.15    | 0.15                             |
| 58       | Inter      | 493                                        | 0.00    | 0.29                             |
| 58       | Low        | 656                                        | 0.00    | 0.22                             |
| 56       | Inter      | 440                                        | 0.00    | 0.00                             |
| 56       | Low        | 1000                                       | 0.00    | 0.00                             |
| 68       | Inter      | 471                                        | 0.00    | 0.00                             |
| 68       | Low        | 443                                        | 0.00    | 0.00                             |

Table gives number of women (N) within each category with no infections in categories higher in the hierarchy.



For example, the PPV for CIN3+ for a woman with an intermediate viral load of HPV33 was 6.36, given she did not have high viral load of HPV16. In comparison (Table 4), the PPV for CIN3+ if a woman had intermediate viral load of HPV33 was 6.20, given she had no HPV16 infection (regardless of viral load).
